# Supplementary material for: High‐quality genome‐scale metabolic modelling of Pseudomonas putida highlights its broad metabolic capabilities
Source: PubMed Central journal article supplement — Environ Microbiol. 2019 Nov 11;22(1):255–69. doi: 10.1111/1462-2920.14843 (PMC7078882; doi:10.1111/1462-2920.14843), 2019-11-11
Supplement: EMI-22-255-s002.pdf [file EMI-22-255-s002.pdf]

## Independent Section

Contains tests that are independent of the class of modeled organism, a model's complexity or types of identifiers that are used to describe its components. Parameterization or initialization of the network is not required. See readme for more details.

### Consistency

|                                  |            |    |   |
|----------------------------------|------------|----|---|
| Stoichiometric Consistency       | 99.9%      | x3 | ▼ |
| Mass Balance                     | 99.6%      |    | ▼ |
| Charge Balance                   | 99.7%      |    | ▼ |
| Metabolite Connectivity          | 99.9%      |    | ▼ |
| Unbounded Flux In Default Medium | 83.2%      |    | ▼ |
| <b>Sub Total</b>                 | <b>97%</b> | x3 | ▼ |

### Annotation - Metabolites

Presence of Metabolite Annotation 100.0% ▼

Metabolite Annotations Per Database **Info** ▼

|                   |       |   |
|-------------------|-------|---|
| pubchem.compound  | 0.0%  | ▼ |
| kegg.compound     | 57.7% | ▼ |
| seed.compound     | 65.8% | ▼ |
| inchikey          | 0.0%  | ▼ |
| inchi             | 0.0%  | ▼ |
| chebi             | 60.1% | ▼ |
| hmdb              | 0.0%  | ▼ |
| reactome          | 30.2% | ▼ |
| metanetx.chemical | 74.9% | ▼ |
| bigg.metabolite   | 72.2% | ▼ |
| biocyc            | 0.0%  | ▼ |

Metabolite Annotation Conformity Per Database **Info** ▼

|                   |        |   |
|-------------------|--------|---|
| pubchem.compound  | 0.0%   | ▼ |
| kegg.compound     | 100.0% | ▼ |
| seed.compound     | 100.0% | ▼ |
| inchikey          | 0.0%   | ▼ |
| inchi             | 0.0%   | ▼ |
| chebi             | 0.0%   | ▼ |
| hmdb              | 0.0%   | ▼ |
| reactome          | 0.0%   | ▼ |
| metanetx.chemical | 100.0% | ▼ |
| bigg.metabolite   | 100.0% | ▼ |
| biocyc            | 0.0%   | ▼ |

Uniform Metabolite Identifier Namespace 100.0% ▼

**Sub Total** 67% ▼

### Annotation - Reactions

Presence of Reaction Annotation 100.0% ▼

Reaction Annotations Per Database **Info** ▼

|      |      |   |
|------|------|---|
| rhea | 0.0% | ▼ |
|------|------|---|

## Specific Section

Covers general statistics and specific aspects of a metabolic network that are not universally applicable. See readme for more details.

### SBML

|                        |         |   |
|------------------------|---------|---|
| SBML Level and Version | Errored | ▼ |
| FBC enabled            | Errored | ▼ |

### Basic Information

|                    |         |   |
|--------------------|---------|---|
| Model Identifier   | iJN1463 | ▼ |
| Total Metabolites  | 2,155   | ▼ |
| Total Reactions    | 2,940   | ▼ |
| Total Genes        | 1,462   | ▼ |
| Total Compartments | 4       | ▼ |
| Metabolic Coverage | 2.01    | ▼ |

### Metabolite Information

|                                                 |       |   |
|-------------------------------------------------|-------|---|
| Unique Metabolites                              | 2,155 | ▼ |
| Duplicate Metabolites in Identical Compartments | 0     | ▼ |
| Metabolites without Charge                      | 0     | ▼ |
| Metabolites without Formula                     | 0     | ▼ |
| Medium Components                               | 40    | ▼ |

### Reaction Information

|                                                           |       |   |
|-----------------------------------------------------------|-------|---|
| Purely Metabolic Reactions                                | 1,732 | ▼ |
| Purely Metabolic Reactions with Constraints               | 75    | ▼ |
| Transport Reactions                                       | 824   | ▼ |
| Transport Reactions with Constraints                      | 32    | ▼ |
| Thermodynamic Reversibility of Purely Metabolic Reactions | 0.43  | ▼ |
| Reactions With Partially Identical Annotations            | 0.02  | ▼ |
| Duplicate Reactions                                       | 0.00  | ▼ |
| Reactions With Identical Genes                            | 0.77  | ▼ |

### Gene-Protein-Reaction (GPR) Associations

|                                             |      |   |
|---------------------------------------------|------|---|
| Reactions without GPR                       | 451  | ▼ |
| Fraction of Transport Reactions without GPR | 0.39 | ▼ |
| Enzyme Complexes                            | 312  | ▼ |

### Biomass

|                                      |             |   |
|--------------------------------------|-------------|---|
| Biomass Reactions Identified         | 2           | ▼ |
| Biomass Consistency                  | <b>Info</b> | ▼ |
| BiomassKT2440_Core2                  | 0.98        | ▼ |
| BiomassKT2440_WT3                    | 0.98        | ▼ |
| Biomass Production In Default Medium | <b>Info</b> | ▼ |
| BiomassKT2440_Core2                  | 0.62        | ▼ |
| BiomassKT2440_WT3                    | 0.62        | ▼ |

|                                                    |             |   |
|----------------------------------------------------|-------------|---|
| metanetx.reaction                                  | 20.8%       | ▼ |
| bigg.reaction                                      | 63.6%       | ▼ |
| reactome                                           | 0.0%        | ▼ |
| ec-code                                            | 0.0%        | ▼ |
| brenda                                             | 0.0%        | ▼ |
| biocyc                                             | 0.0%        | ▼ |
| <b>Reaction Annotation Conformity Per Database</b> | <b>Info</b> | ▼ |
| rhea                                               | 0.0%        | ▼ |
| kegg.reaction                                      | 0.0%        | ▼ |
| seed.reaction                                      | 0.0%        | ▼ |
| metanetx.reaction                                  | 100.0%      | ▼ |
| bigg.reaction                                      | 100.0%      | ▼ |
| reactome                                           | 0.0%        | ▼ |
| ec-code                                            | 0.0%        | ▼ |
| brenda                                             | 0.0%        | ▼ |
| biocyc                                             | 0.0%        | ▼ |
| <b>Uniform Reaction Identifier Namespace</b>       | 100.0%      | ▼ |

**Sub Total** 58% ▼

**Annotation - Genes**

**Presence of Gene Annotation** 100.0% ▼

**Gene Annotations Per Database** **Info** ▼

|             |       |   |
|-------------|-------|---|
| refseq      | 98.5% | ▼ |
| uniprot     | 98.5% | ▼ |
| ecogene     | 0.0%  | ▼ |
| kegg.genes  | 98.8% | ▼ |
| ncbigi      | 0.0%  | ▼ |
| ncbigene    | 0.0%  | ▼ |
| ncbiprotein | 0.0%  | ▼ |
| ccds        | 0.0%  | ▼ |
| hprd        | 0.0%  | ▼ |
| asap        | 0.0%  | ▼ |

**Gene Annotation Conformity Per Database** **Info** ▼

|             |        |   |
|-------------|--------|---|
| refseq      | 99.4%  | ▼ |
| uniprot     | 100.0% | ▼ |
| ecogene     | 0.0%   | ▼ |
| kegg.genes  | 100.0% | ▼ |
| ncbigi      | 0.0%   | ▼ |
| ncbigene    | 0.0%   | ▼ |
| ncbiprotein | 0.0%   | ▼ |
| ccds        | 0.0%   | ▼ |
| hprd        | 0.0%   | ▼ |
| asap        | 0.0%   | ▼ |

**Sub Total** 53% ▼

**Annotation - SBO Terms**

|                                                        |             |   |
|--------------------------------------------------------|-------------|---|
| BiomassKT2440_WT3                                      | false       | ▼ |
| <b>Biomass Production In Complete Medium</b>           | <b>Info</b> | ▼ |
| BiomassKT2440_Core2                                    | 253.51      | ▼ |
| BiomassKT2440_WT3                                      | 254.91      | ▼ |
| <b>Blocked Biomass Precursors In Default Medium</b>    | <b>Info</b> | ▼ |
| BiomassKT2440_Core2                                    | 0           | ▼ |
| BiomassKT2440_WT3                                      | 0           | ▼ |
| <b>Blocked Biomass Precursors In Complete Medium</b>   | <b>Info</b> | ▼ |
| BiomassKT2440_Core2                                    | 0           | ▼ |
| BiomassKT2440_WT3                                      | 0           | ▼ |
| <b>Ratio of Direct Metabolites in Biomass Reaction</b> | <b>Info</b> | ▼ |
| BiomassKT2440_Core2                                    | 0.09        | ▼ |
| BiomassKT2440_WT3                                      | 0.09        | ▼ |
| <b>Number of Missing Essential Biomass Precursors</b>  | <b>Info</b> | ▼ |
| BiomassKT2440_Core2                                    | 2           | ▼ |
| BiomassKT2440_WT3                                      | 1           | ▼ |

**Energy Metabolism**

**Non-Growth Associated Maintenance Reaction** 1 ▼

**Growth-associated Maintenance in Biomass Reaction** **Info** ▼

|                     |      |   |
|---------------------|------|---|
| BiomassKT2440_Core2 | true | ▼ |
| BiomassKT2440_WT3   | true | ▼ |

**Number of Reversible Oxygen-Containing Reactions** 5 ▼

**Erroneous Energy-generating Cycles** **Info** ▼

|           |         |   |
|-----------|---------|---|
| MNXM3     | Skipped | ▼ |
| MNXM63    | Skipped | ▼ |
| MNXM51    | Skipped | ▼ |
| MNXM121   | Skipped | ▼ |
| MNXM423   | Skipped | ▼ |
| MNXM6     | Skipped | ▼ |
| MNXM10    | Skipped | ▼ |
| MNXM38    | Skipped | ▼ |
| MNXM208   | Skipped | ▼ |
| MNXM191   | Skipped | ▼ |
| MNXM223   | Skipped | ▼ |
| MNXM7517  | Skipped | ▼ |
| MNXM12233 | Skipped | ▼ |
| MNXM558   | Skipped | ▼ |
| MNXM21    | Skipped | ▼ |
| MNXM89557 | Skipped | ▼ |

**Network Topology**

**Universally Blocked Reactions** 247 ▼

**Orphan Metabolites** 57 ▼

**Dead-end Metabolites** 85 ▼

|                                         |             |             |
|-----------------------------------------|-------------|-------------|
| Reaction General SBO Presence           | 100.0%      | ▼           |
| Metabolic Reaction SBO:0000176 Presence | 99.9%       | ▼           |
| Transport Reaction SBO:0000185 Presence | 100.0%      | ▼           |
| Exchange Reaction SBO:0000627 Presence  | 100.0%      | ▼           |
| Demand Reaction SBO:0000628 Presence    | 100.0%      | ▼           |
| Sink Reactions SBO:0000632 Presence     | 100.0%      | ▼           |
| Gene General SBO Presence               | 100.0%      | ▼           |
| Gene SBO:0000243 Presence               | 100.0%      | ▼           |
| Biomass Reactions SBO:0000629 Presence  | 100.0%      | ▼           |
| <b>Sub Total</b>                        | <b>100%</b> | <b>x2 ▼</b> |

**Total Score** 91% ^

The Total Score is the result of the following calculation. For more information please click on "Readme" in the top left of the report.

$$\frac{(3 \cdot 97.44) + (1 \cdot 67.29) + (1 \cdot 57.90) + (1 \cdot 53.17) + (2 \cdot 99.99)}{(3 \cdot 100) + (1 \cdot 100) + (1 \cdot 100) + (1 \cdot 100) + (2 \cdot 100)} = 90.86$$

Total Score

91%

Score per Category

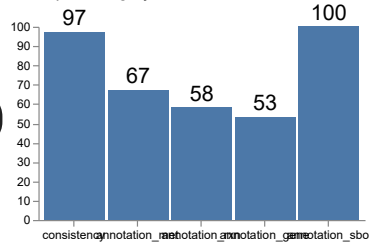

Metabolite Consumption In Complete Medium 289 ▼

### Matrix Conditioning

|                                     |      |   |
|-------------------------------------|------|---|
| Ratio Min/Max Non-Zero Coefficients | 0.00 | ▼ |
| Independent Conservation Relations  | 59   | ▼ |
| Rank                                | 2096 | ▼ |
| Degrees Of Freedom                  | 844  | ▼ |

### Experimental Data Comparison

|                              |         |   |
|------------------------------|---------|---|
| Growth Prediction            | Skipped | ▼ |
| Gene Essentiality Prediction | Skipped | ▼ |

### Misc. Tests

### Environment

|                |       |
|----------------|-------|
| Python Version | 3.6.8 |
| Platform       | Linux |
| Memote Version | 0.9.6 |
